# Supplementary material for: Atrophin–Rpd3 complex represses Hedgehog signaling by acting as a corepressor of CiR
Source: PubMed Central journal article supplement — J Cell Biol. 2013 Nov 25;203(4):575–83. doi: 10.1083/jcb.201306012 (PMC3840934; doi:10.1083/jcb.201306012), 2013-11-25
Supplement: supp_jcb.201306012_JCB_201306012_sm.pdf [file supp_jcb.201306012_JCB_201306012_sm.pdf]

Zhang et al., <http://www.jcb.org/cgi/content/full/jcb.201306012/DC1>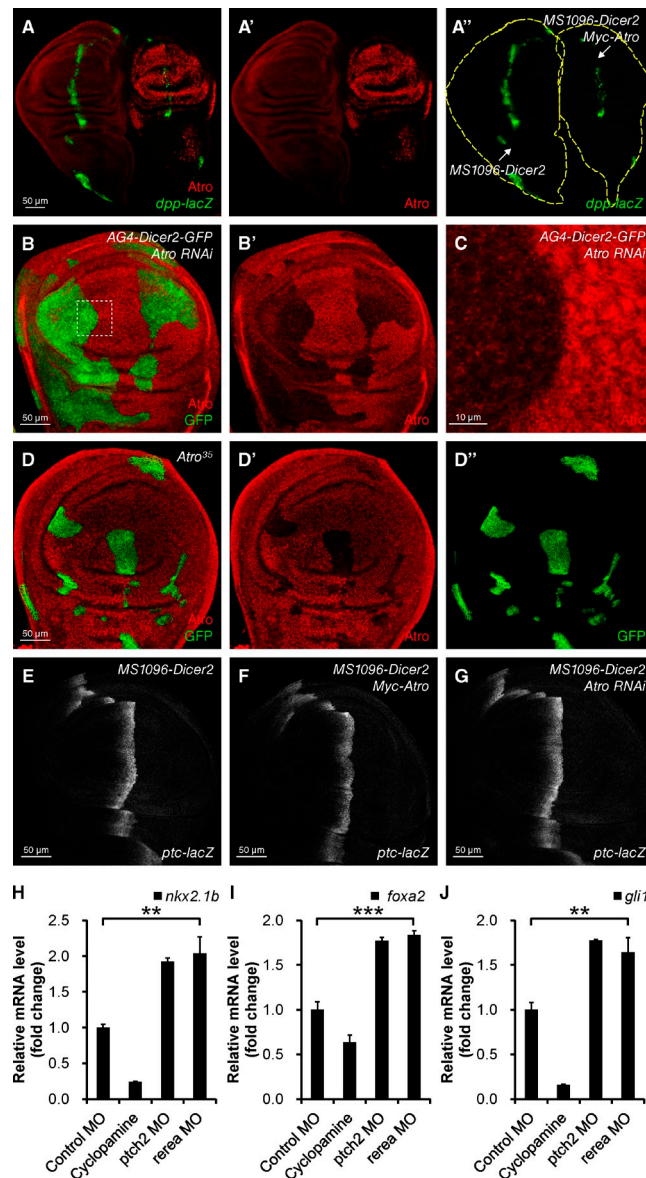

Figure S1. **An Hh signaling repressor function of Atro in *D. melanogaster* and Rerea in zebrafish.** (A–A'') To make a reliable comparison between different staining, fly imaginal discs from MS1096-Dicer2 × Myc-Atro/TM6B were dissected to make both the wild-type control and Atro overexpression discs existing in a same tube. Atro antibody (red) was used to identify wild-type (left) and Atro overexpression (right) discs. Atro overexpression reduced *dpp-lacZ* staining (green). (B and C) Low (B and B') and high (C) magnifications of a wing disc expressing *Atro RNAi* with AG4-Dicer2-GFP immunostained with Atro (red) and GFP (green) antibodies. *Atro* knockdown (marked by GFP-positive cells) resulted in a reduction of endogenous Atro levels. (D–D'') A wing disc carrying *Atro<sup>35</sup>* mutant clones was immunostained to show the expression of Atro (red) and GFP (green). *Atro<sup>35</sup>* mutant clones (marked by GFP-positive cells) exhibited diminished Atro levels. (E–G) A wild-type wing disc (E) or wing discs expressing Myc-Atro (F) or *Atro RNAi* (G) with MS1096-Dicer2 Gal4 were immunostained to show the expression of *ptc-lacZ*. No obvious changes of *ptc-lacZ* levels were observed. (H–J) Relative mRNA levels of *nkx2.1b*, *foxa2*, and *gli1* from 24-hpf zebrafish embryos that were injected with indicated MOs or treated with cyclopanine (10  $\mu$ M) at 24 hpf (mean  $\pm$  SD;  $n \geq 3$ ). P-values were obtained by student's *t* test between two groups (\*\*,  $P < 0.01$ ; \*\*\*,  $P < 0.001$ ).

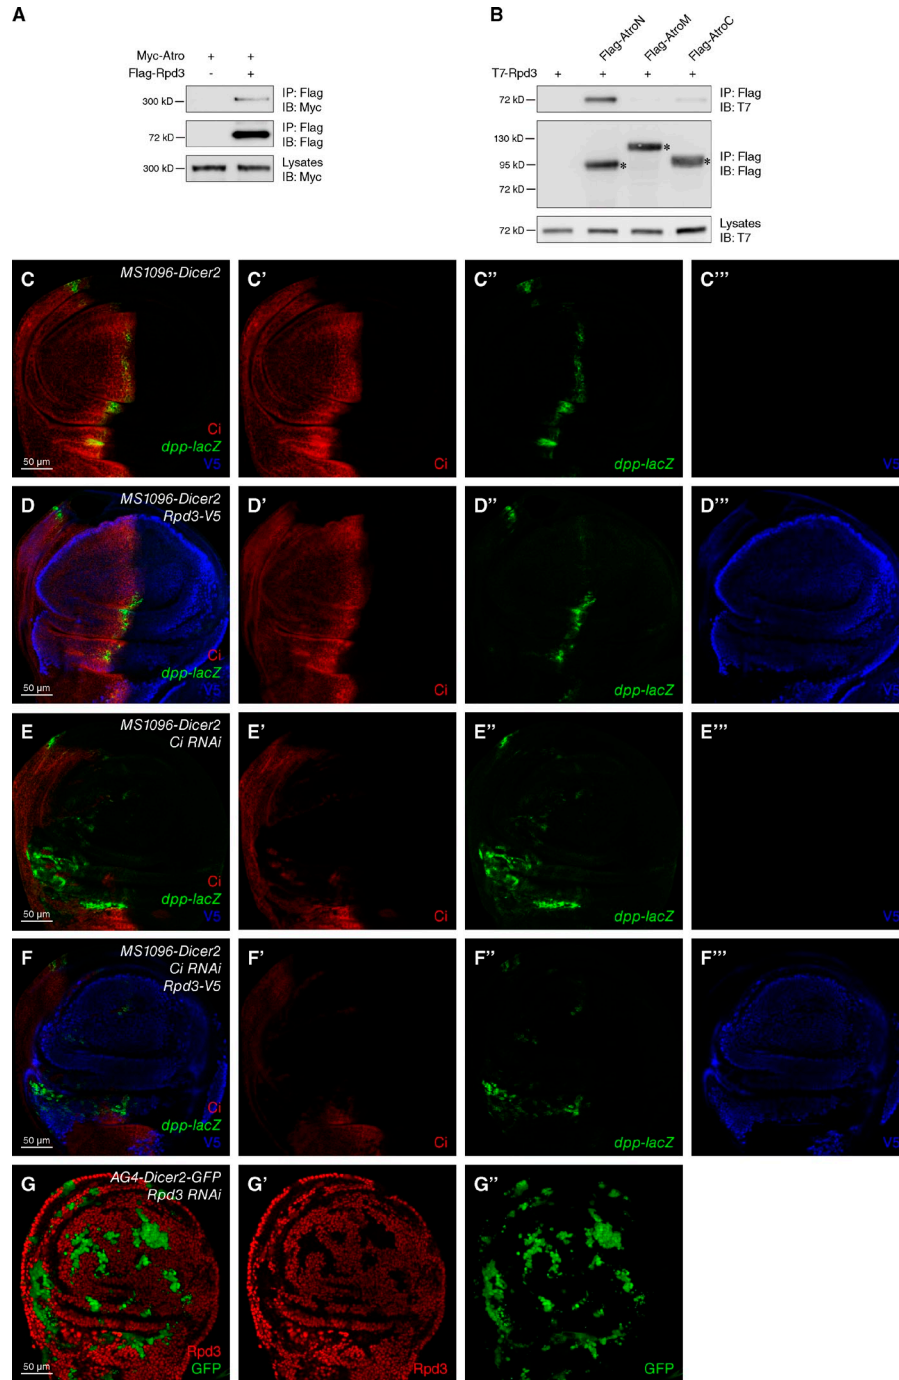

Figure S2. **The repressor function of Rpd3 in Hh signaling depends on Ci.** (A and B) Western blots of immunoprecipitates (top two panels) or lysates (bottom) from S2 cells expressing the indicated proteins. Rpd3 interacted with the N-terminal region of Atr. Asterisks indicate the target proteins. (C–F''') Wing discs expressing the indicated transgenes were immunostained to show the expression of *dpp-lacZ* (red), Ci (green), and V5 (blue). Rpd3 overexpression failed to inhibit the expression of *dpp-lacZ* in the absence of Ci. (G–G'') A wing disc expressing *Rpd3 RNAi* with *AG4-Dicer2-GFP* was immunostained with Rpd3 (red) and GFP (green) antibodies. *Rpd3* knockdown (marked by GFP-positive cells) resulted in a reduction of endogenous Rpd3 levels.

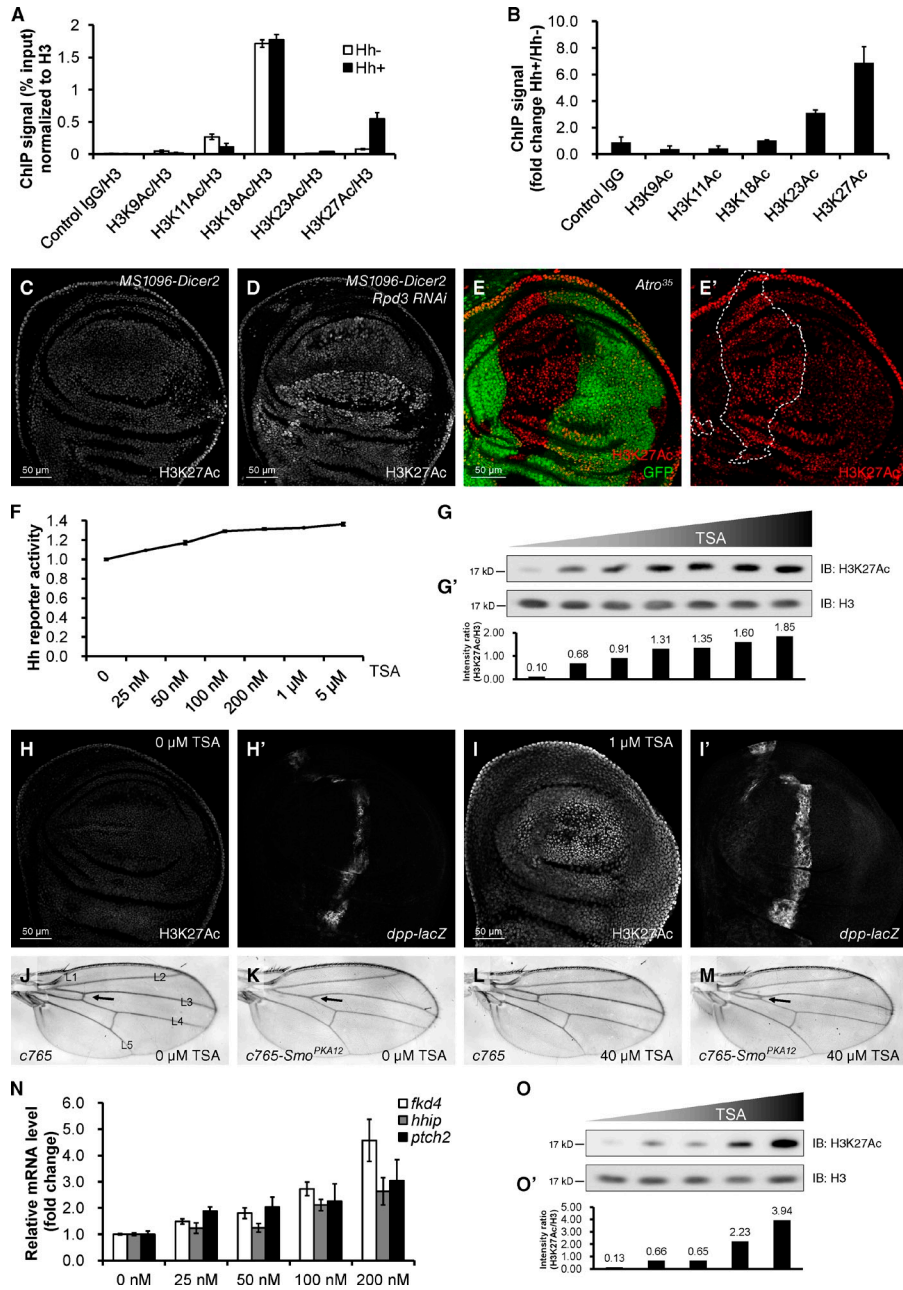

Figure S3. **The correlation between Hh activation and increased histone H3 acetylation.** (A and B) ChIP for H3K9Ac, H3K11Ac, H3K18Ac, H3K23Ac, and H3K27Ac around the transcriptional start region of *dpp* gene in Cl.8 cells with/without Hh treatment. Data of ChIP signals were normalized to 1/10 of input and then to histone H3 in A, and were further shown as the fold change of Hh+ to Hh- groups in B (mean  $\pm$  SD;  $n = 3$ ). (C and D) A wild-type wing disc (C) or wing disc expressing *Rpd3 RNAi* (D) with *MS1096-Dicer2* Gal4 were immunostained by H3K27Ac antibody. (E and E') A wing disc carrying *Atro<sup>35</sup>* mutant clones (marked by GFP-negative cells in dashed lines) was immunostained to show the expression H3K27Ac (red) and GFP (green). (F-G') S2 cells treated with gradient concentrations of TSA showed increased Hh reporter activity (F) and H3K27Ac level (G and G'). Data are represented as mean  $\pm$  SD;  $n = 3$ . (H-I') Wing discs treated with TSA in vitro were immunostained to show the expression of *dpp-lacZ* and H3K27Ac. (J-M) Adult wings of indicated flies were fed with foods supplemented with TSA. TSA feeding partially rescued "fused" phenotype (arrows) of *c765-Smo<sup>PKA12</sup>*. (N-O') 24-hpf zebrafish embryos treated with gradient concentrations of TSA exhibited the up-regulated mRNA level of Hh-responsive genes (N) and H3K27Ac level (O and O'). Data are represented as mean  $\pm$  SD;  $n \geq 3$ .
